# Supplementary material for: Short-chain fatty acids promote the effect of environmental signals on the gut microbiome and metabolome in mice
Source: PubMed Central journal article supplement (PMC9156677; doi:10.1038/s42003-022-03468-9), 2022-05-31
Supplement: 42003_2022_3468_MOESM1_ESM.pdf [file 42003_2022_3468_MOESM1_ESM.pdf]

## **Description of Additional Supplementary Files**

**File Name:** Supplementary Data 1

**Description:** Pairwise analysis between SE and EE species abundance

**File Name:** Supplementary Data 2

**Description:** Table reporting the level of assignment for SE and EE fecal metabolites.

**File Name:** Supplementary Data 3

**Description:** Abundances of fecal metabolites in SE and EE, source data for figure 2b and 2c

**File Name:** Supplementary Data 4

**Description:** **Source data for supplementary figure 5**

**File Name:** Supplementary Data 5

**Description:** Source data for figure 1a, 1d and 1f

**File Name:** Supplementary Data 6

**Description:** Source data for figures 3 and 4
