# Supplementary material for: Short-chain fatty acids promote the effect of environmental signals on the gut microbiome and metabolome in mice
Source: PubMed Central journal article supplement (PMC9156677; doi:10.1038/s42003-022-03468-9), 2022-05-31
Supplement: 42003_2022_3468_MOESM2_ESM.pdf [file 42003_2022_3468_MOESM2_ESM.pdf]

## Supplementary Figures and Tables

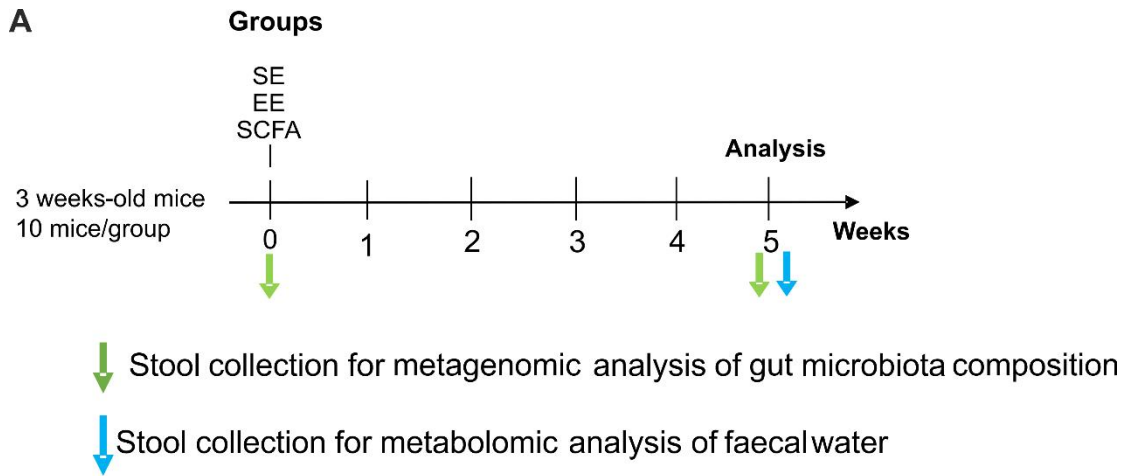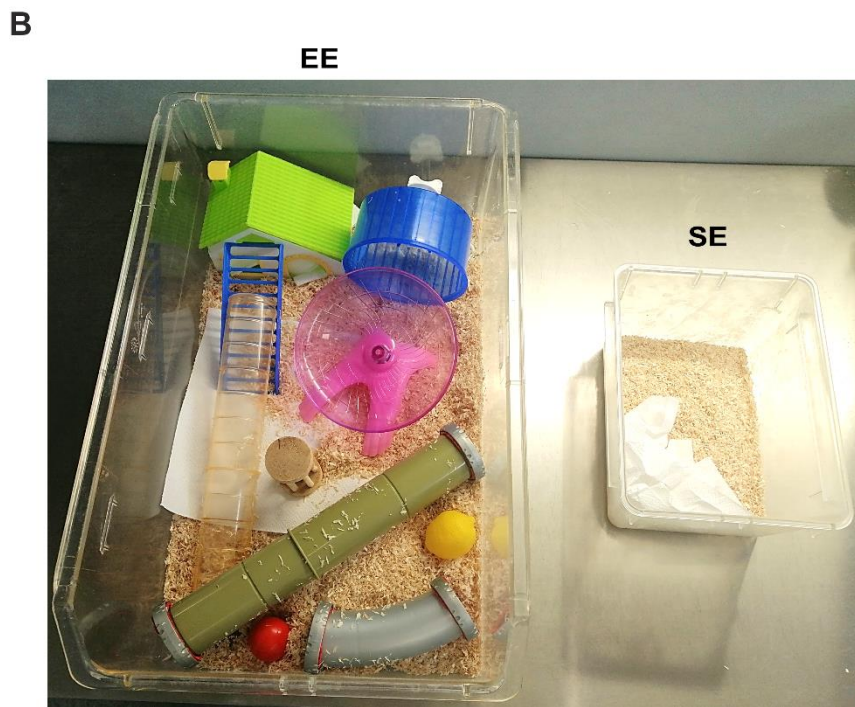

**Supplementary Figure 1: a.** Experimental plan showing animal groups (at least ten mice), age, and timing of stool collection and analysis. **b.** Picture showing the different housing conditions: Environmental Enrichment (EE) on the left and Standard Environment (SE) on the right.

**a**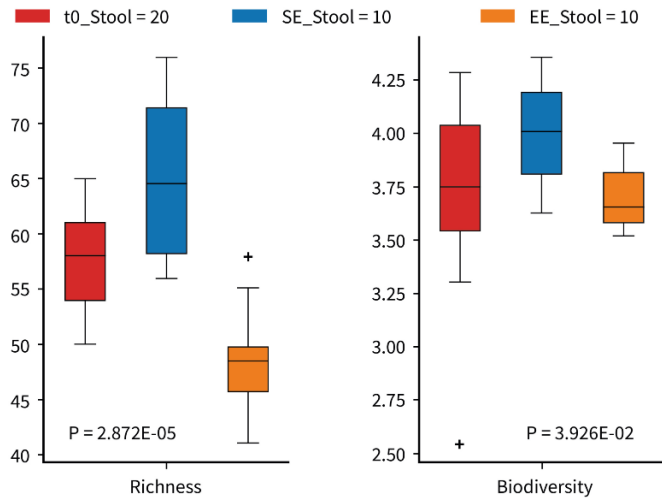**b**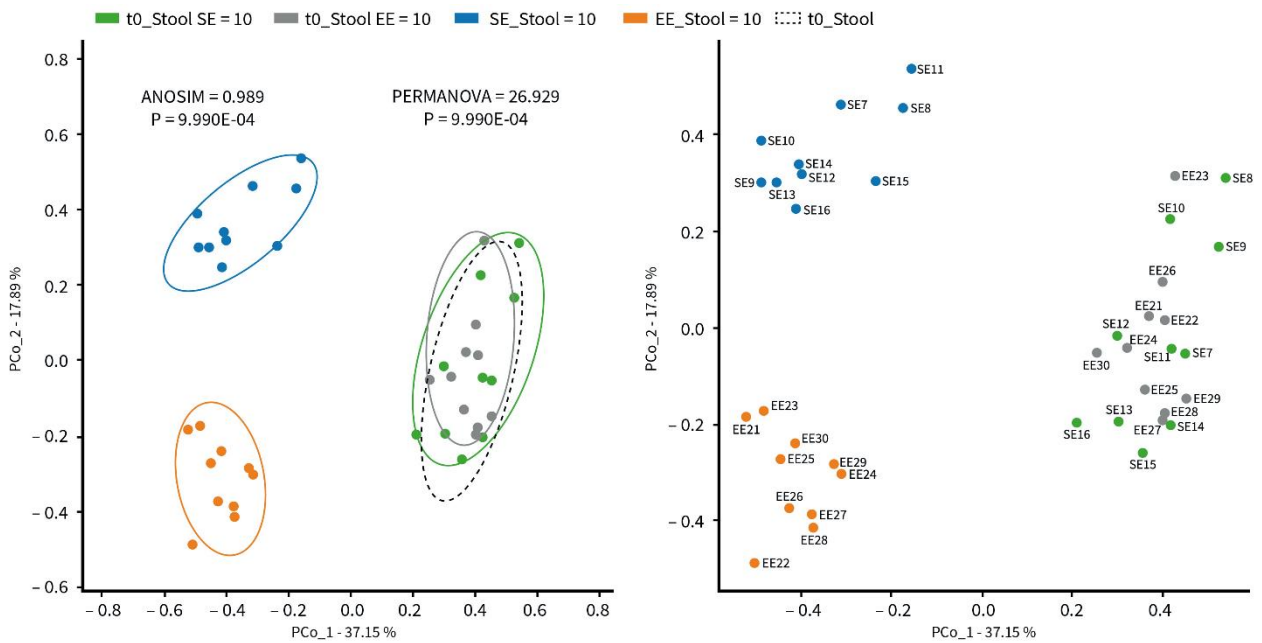**c**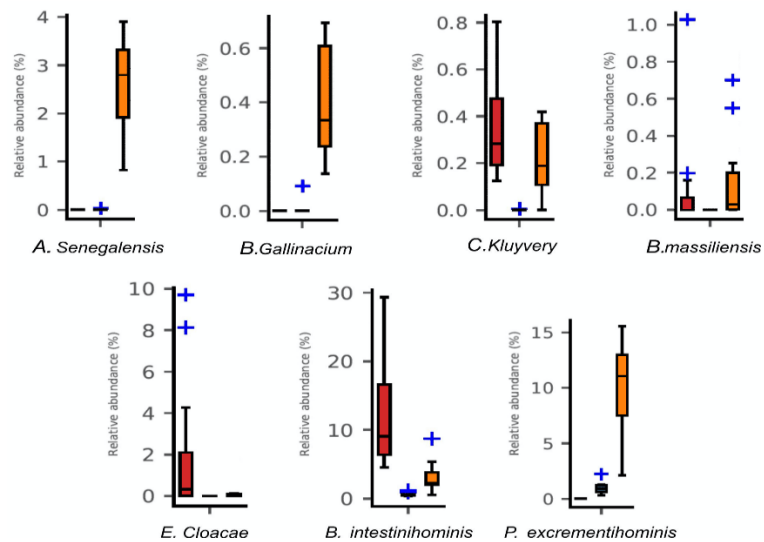

**Supplementary Figure 2: a.** Alpha-diversity analysis for microbiota richness (number of bacterial species) and biodiversity (Shannon metric) at time zero ( $t_0$ ) and after 5 weeks in EE or in SE. Beta-diversity analysis (**b, left**) at time zero ( $t_0$ ) and after 5 weeks in EE or in SE. **Right**, the same analysis showing the mouse number in  $t_0$  group (baseline, 20 mice named *SE 7-16*, *EE 21-30* for their future destiny), in EE group (10 mice named *EE 21-30*) and in SE group (10 mice named *SE 7-16*). **c.** Analysis of 7 selected species (belonging to EE-related SIG1) depicts significant differences in terms of relative abundance when matched with  $t_0$ . P value from multiple comparison analysis among  $t_0$  and SE and EE cohorts are the follow: *A. senegalensis*  $P=1,821\cdot 10^{-7}$  EE vs  $t_0$ ; *B. gallinacium*  $P=2.264\cdot 10^{-7}$  EE vs  $t_0$ ; *C. kluyveri*  $P=2.350\cdot 10^{-5}$  SE vs  $t_0$  and  $P=0.031$  EE vs  $t_0$ ; *B. massiliensis*  $P=0.015$  SE vs  $t_0$ ; *E. cloacae*  $P=0.0007$  SE vs  $t_0$  and  $P=0.029$  EE vs  $t_0$ ; *B. intestinhominis*  $P=0.000012$  SE vs  $t_0$  and  $P=0.0001$  EE vs  $t_0$ ; *P. excrementihominis*  $P=5.94\cdot 10^{-7}$  SE vs  $t_0$  and  $P=2.27\cdot 10^{-7}$  EE vs  $t_0$ . The boxplots show the minimum, 25th percentile, median, 75th percentile, and maximum values. Error bars = SEM

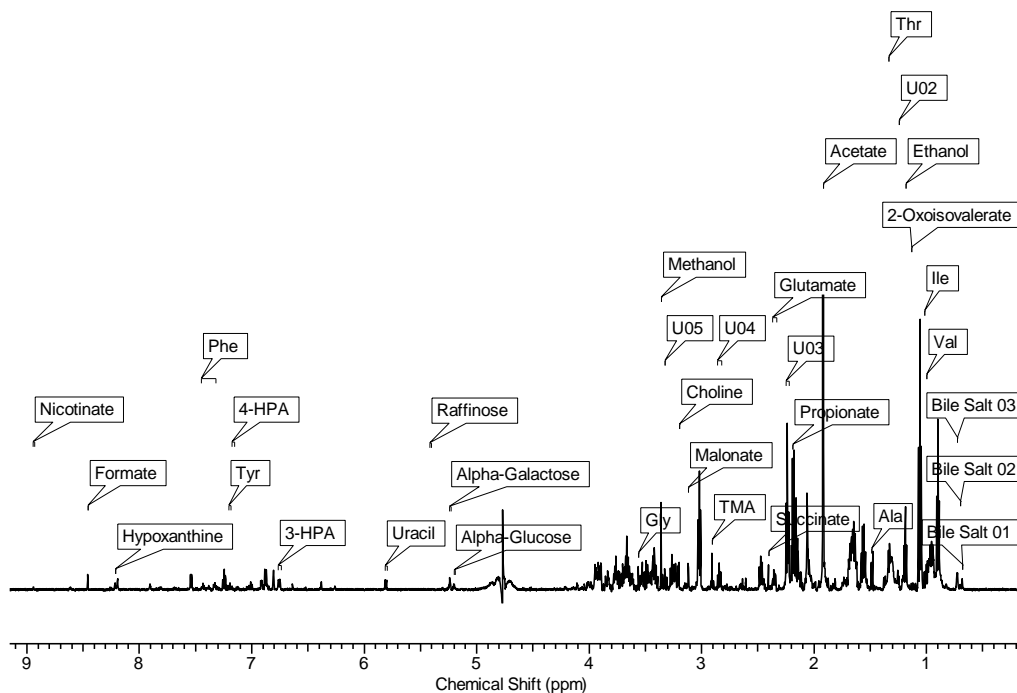

**Supplementary Figure 3:** Representative  $^1\text{H}$  NMR spectrum of fecal water. The assignment of the resonances is reported in Table S1

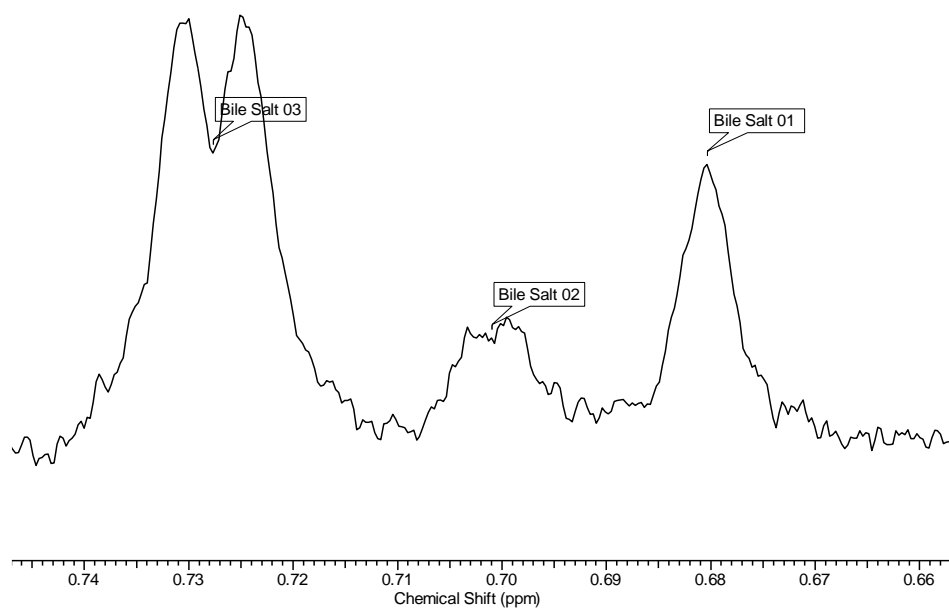

**Supplementary Figure 4:** 1H NMR spectrum of C-18 bile salts moieties

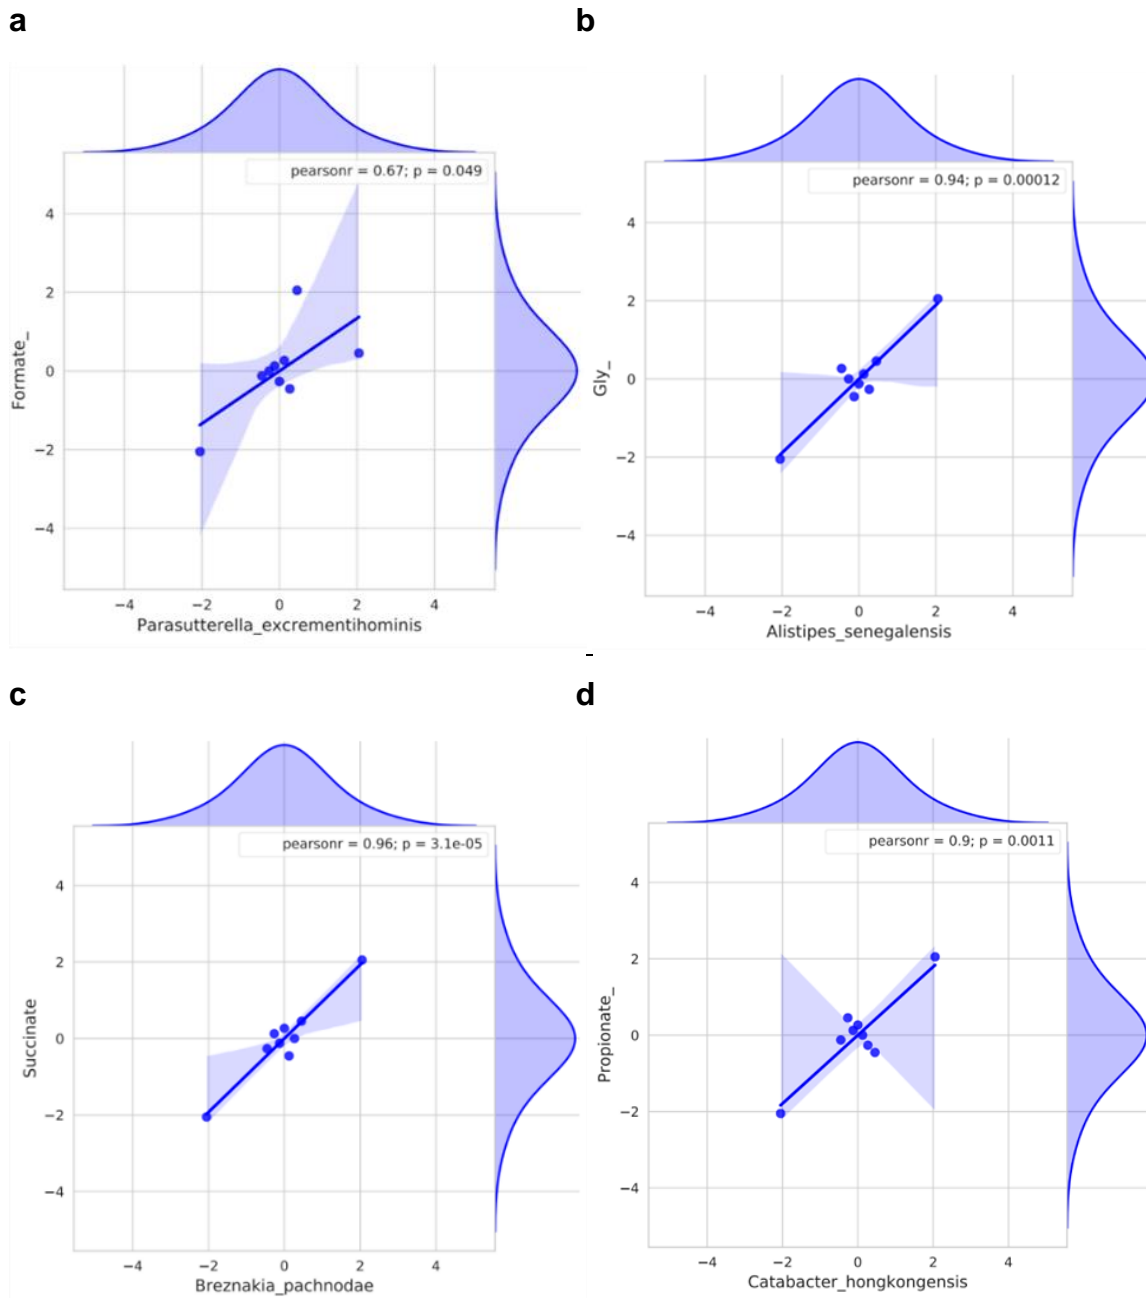

**Supplementary Figure 5:** Raw data (each dot represents 1 mouse) of the Pearson correlations between *Parasutterella. excrementihominis* and the formate (**a**), *Alistipes senegalensis* and glycine (**b**), *Breznakia pachnodae* and succinate (**c**) and *Catabacter hongkongensis* and propionate (**d**).

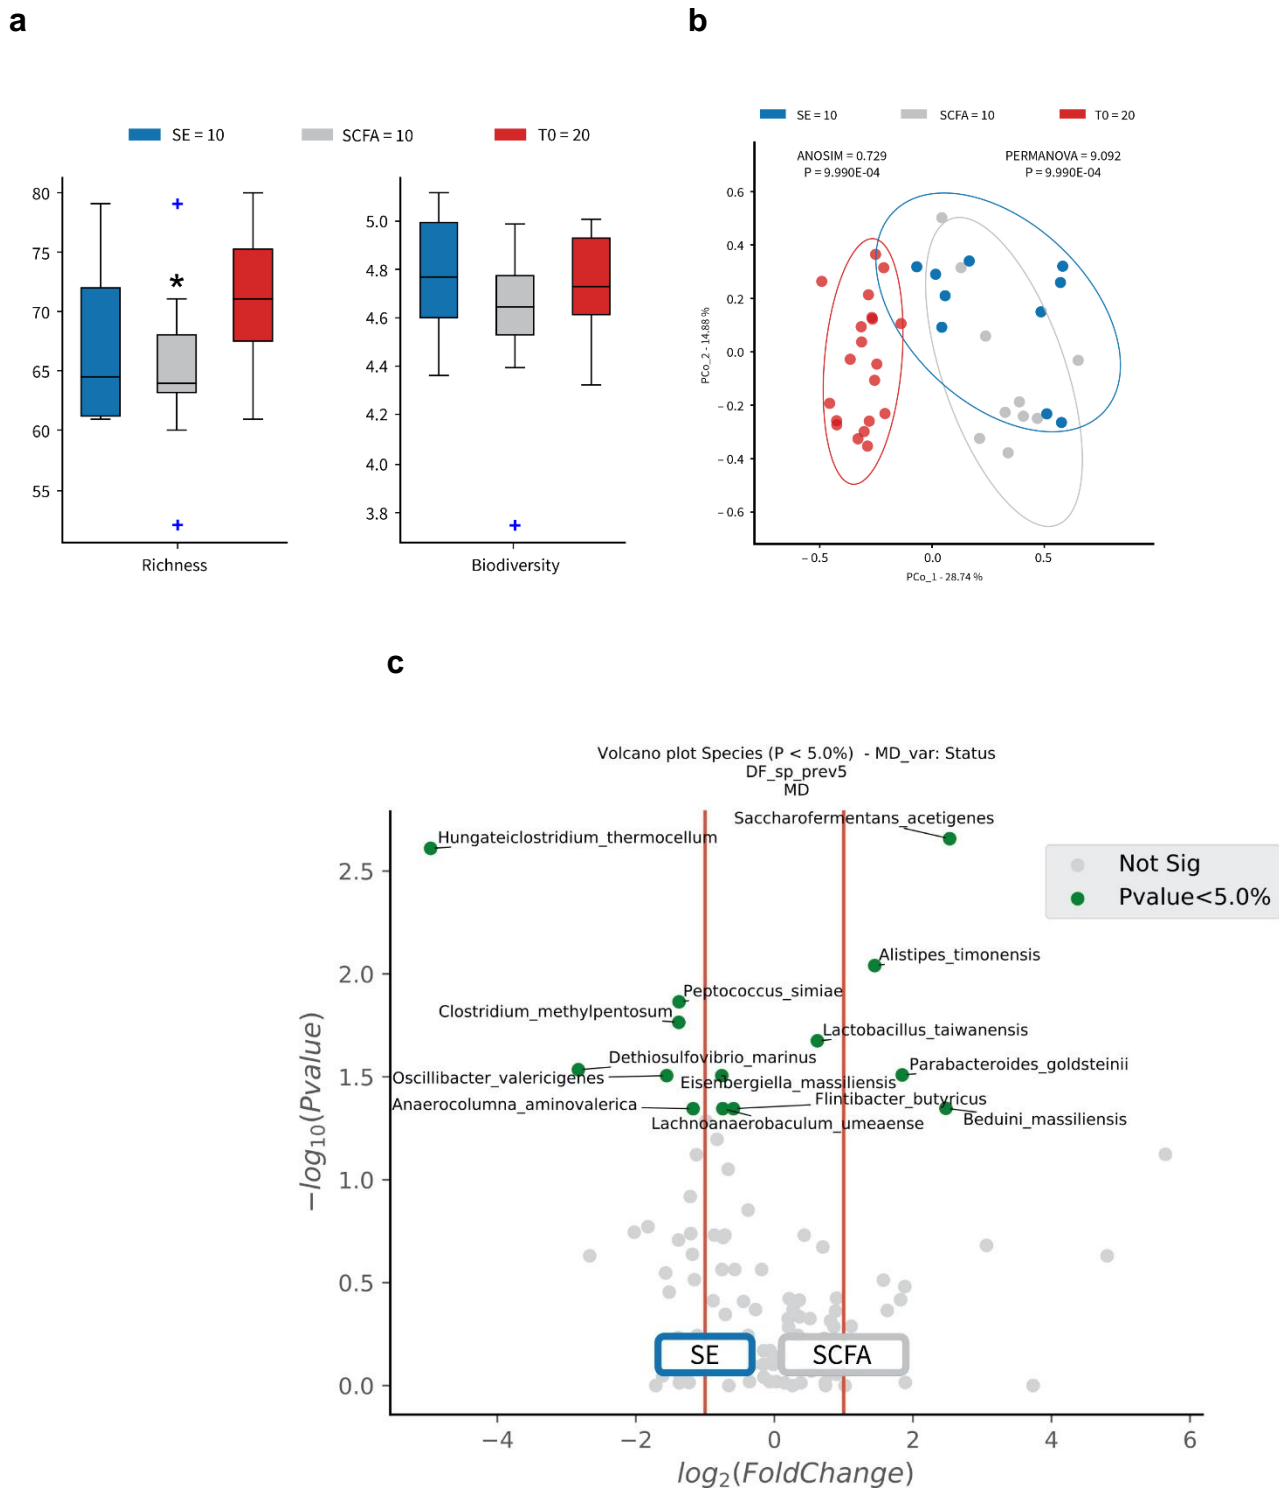

**Supplementary Figure 6:** Alfa-diversity (**a**) shows differences (Kruskal-Wallis test) in richness (number of bacterial species) but not in biodiversity (Shannon metric) among baseline (T0, red, n=20) and short chain fatty acid (SCFA, grey, n=10 p= 0.014). **b.** Beta-diversity depicts differences (Bray-Curtis distance) among groups in terms of microbiota species composition. **c.** Volcano Plot shows discriminant species of fecal microbiome between SE and SCFA groups (in green species significantly different for their relative abundances following Mann-Whitney U test, without two-stages FDR at 10%). The boxplots show the minimum, 25th percentile, median, 75th percentile, and maximum values. Error bars = SEM

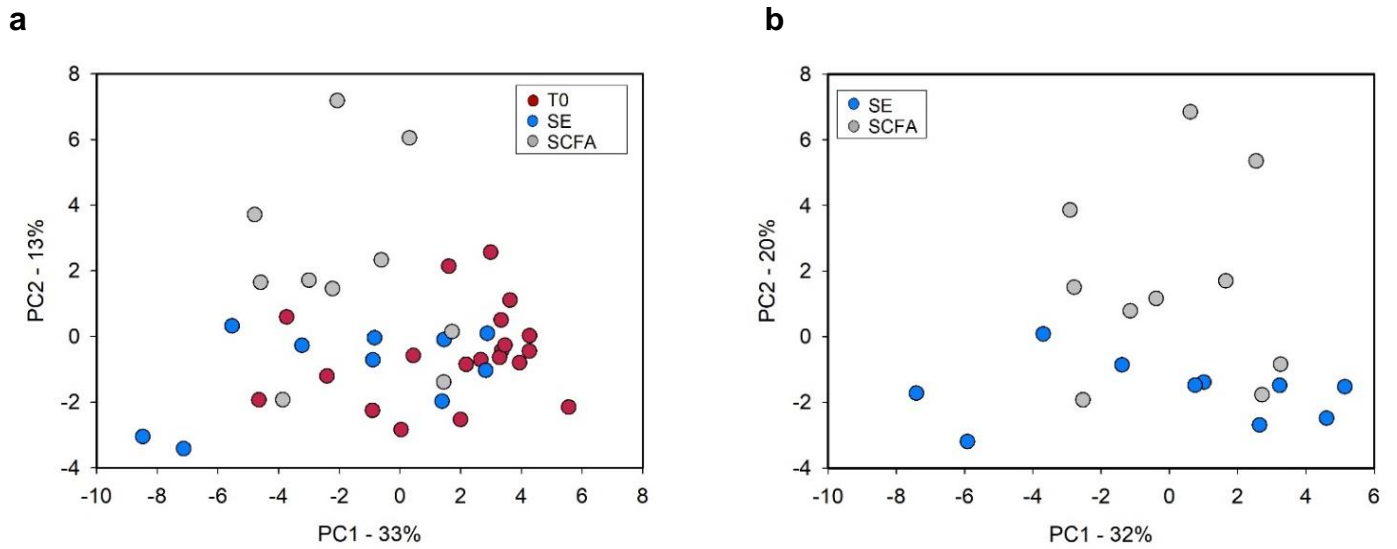

**Supplementary Figure 7:** PCA score plot from **a**) time zero (T0, red, n=20), standard environment (SE, blue, n=10) and short chain fatty acid (SCFA, grey, n=10) mice data set and **b**) SE and SCFA treated mice data set. Here is shown an apparent separation between the treated and not treated samples along the PC2 (20% of the total explained variance).

**Supplementary Table 1:**  $^1\text{H}$  NMR assignment of mice's fecal waters. The level of assignment has been reported according to Salek M. R. et al <sup>1</sup>.

The Supplementary Table 1 is reported as Supplementary Data File 2.

### **Supplementary References**

1. Salek, R. M., Steinbeck, C., Viant, M. R., Goodacre, R. & Dunn, W. B. The role of reporting standards for metabolite annotation and identification in metabolomic studies. *GigaScience* **2**, 2047-217X-2-13 (2013).
